# Supplementary material
Source: bioRxiv or medRxiv preprint supplement (https://medrxiv.org/highwire/filestream/72980/field_highwire_adjunct_files/2/2020.03.01.20029397-3.pdf)
Supplement: Supplementary file [file 2020.03.01.20029397-3.pdf]

# 重庆市黔江中心医院 医学研究伦理委员会

## 科研项目审查批件

2020年科伦审第(7)号

**审查项目名称:** 重庆市 2019-nCov 肺炎患者流行病学和临床特征的多中心描述性回顾分析

**科研课题来源:** 自拟课题

**申请科室:** 呼吸感染科

**主要研究者:** 冯龙华

**审查方式:** 快速审查

**审查文件:** 1.伦理审查申请表; 2.临床研究方案; 3.研究者履历; 4.免知情同意申请

**申请日期:** 2020年2月25日

**批准日期:** 2020年2月27日

---

经院伦理委员会审查,本项目所提交的研究方案等资料符合有关法律法规、医学伦理原则和赫尔辛基宣言的各项要求,研究设计具有科学根据,没有给受试者带来不必要的危险,人类标本提取的途径是规范的,对受试者的安全和隐私给予了最大限度的保护。符合医学伦理学标准。经表决,同意在我院开展本项研究。

重庆市黔江中心医院

医学伦理委员会

医学伦理委员会

2020年2月27日
